# Supplementary material for: Layer-by-layer assembly of supramolecular hexagonal blocks driven by CH–π and π–π interactions
Source: Royal Society of Chemistry journal article supplement (doi:10.1039/c2ce25118c), 2012-01-01
Supplement: c2ce25118c.pdf [file c2ce25118c.pdf]

## Supporting Information

# Layer-by-layer assembly of supramolecular hexagonal blocks driven by CH/ $\pi$ and $\pi$ - $\pi$ interactions

**Muhammad Moazzam Naseer\* and Shahid Hameed**

*Department of Chemistry, Quaid-i-Azam University, Islamabad-45320, Pakistan.*

*Email: moazzam@qau.edu.pk*

## Table of Contents

1. Table 1. Conditions Used for the Cultivation of Single Crystals.
2. Figures S1-S6

**Table 1.** Conditions Used for the Cultivation of Single Crystals.

| No. | Solvents                                                 | Temperature | time | Self-Assembled |
|-----|----------------------------------------------------------|-------------|------|----------------|
| 1   | Ethyl Acetate                                            | 20 °C       | 6 h  | Yes            |
| 2   | Ethyl Acetate:CHCl <sub>3</sub> (2:1)                    | 20 °C       | 8 h  | Yes            |
| 3   | Ethyl Acetate:CH <sub>2</sub> Cl <sub>2</sub> (2:1)      | 20 °C       | 7 h  | Yes            |
| 4   | Acetone:CH <sub>2</sub> Cl <sub>2</sub> (2:1)            | 20 °C       | 9 h  | Yes            |
| 5   | CH <sub>3</sub> CN:CH <sub>2</sub> Cl <sub>2</sub> (2:1) | 20 °C       | 6 h  | Yes            |
| 6   | Ethyl Acetate:Ethanol (2:1)                              | 20 °C       | 10 h | Yes            |
| 7   | Ethanol:CHCl <sub>3</sub> (1:1)                          | 20 °C       | 8 h  | Yes            |

Equimolar solutions of **1** and **2** were mixed in minimum amount of solvents at 20 °C, warmed the mixture to 35 °C. Filtered and kept the solution at 20 °C. Crystals suitable for X-ray diffraction analysis were collected.

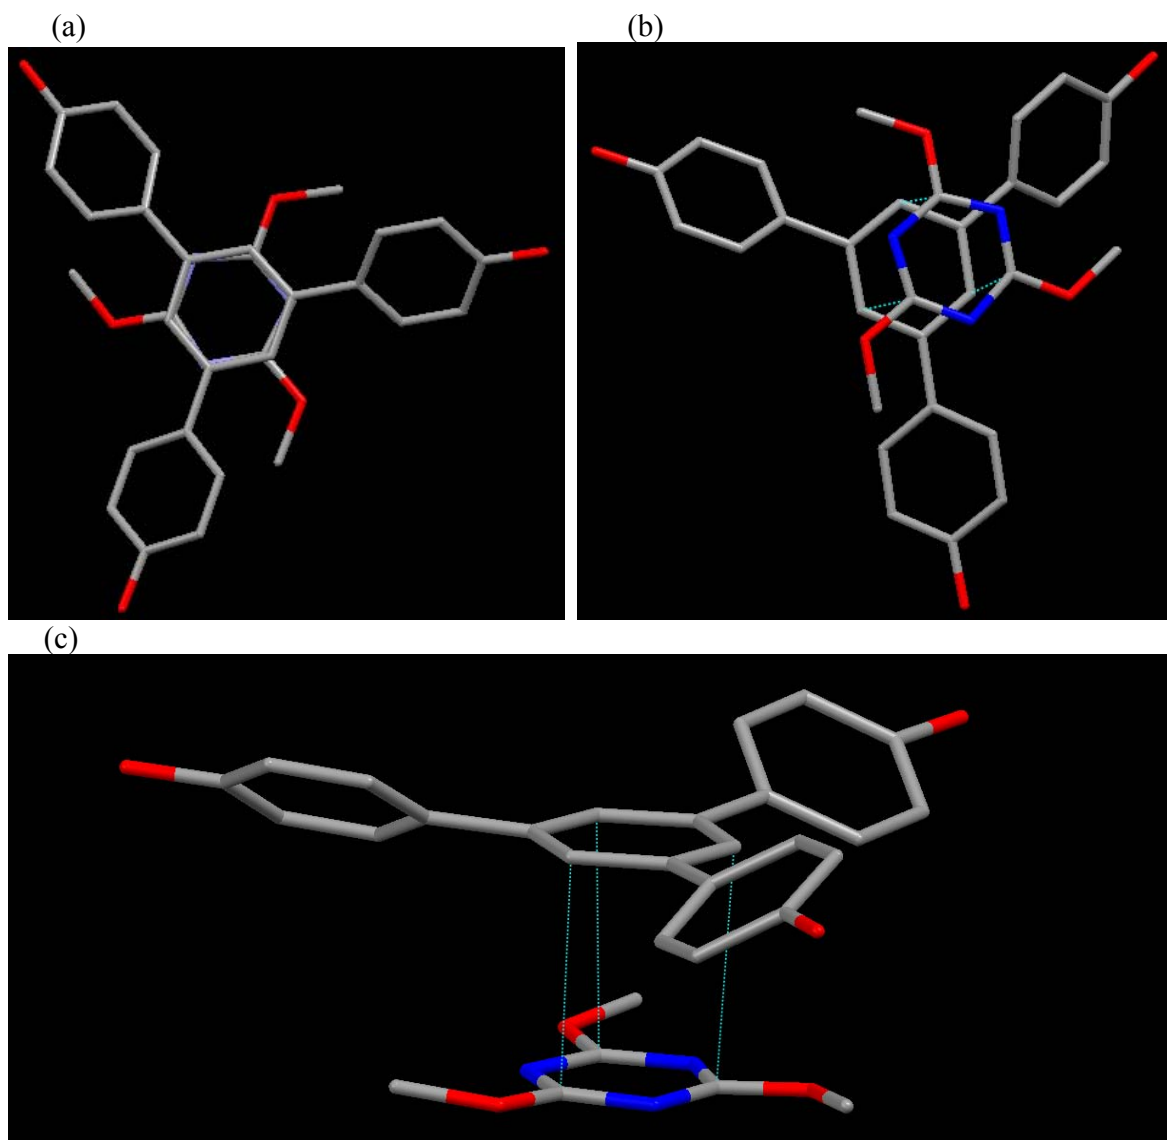

Fig. S1: (a,b) Top view showing staggered arrangement and (c) side view showing  $\pi$ - $\pi$  stacking interactions between **1** and **2** of two successive layers. Hydrogen atoms are removed for the view point of clarity.

(a)

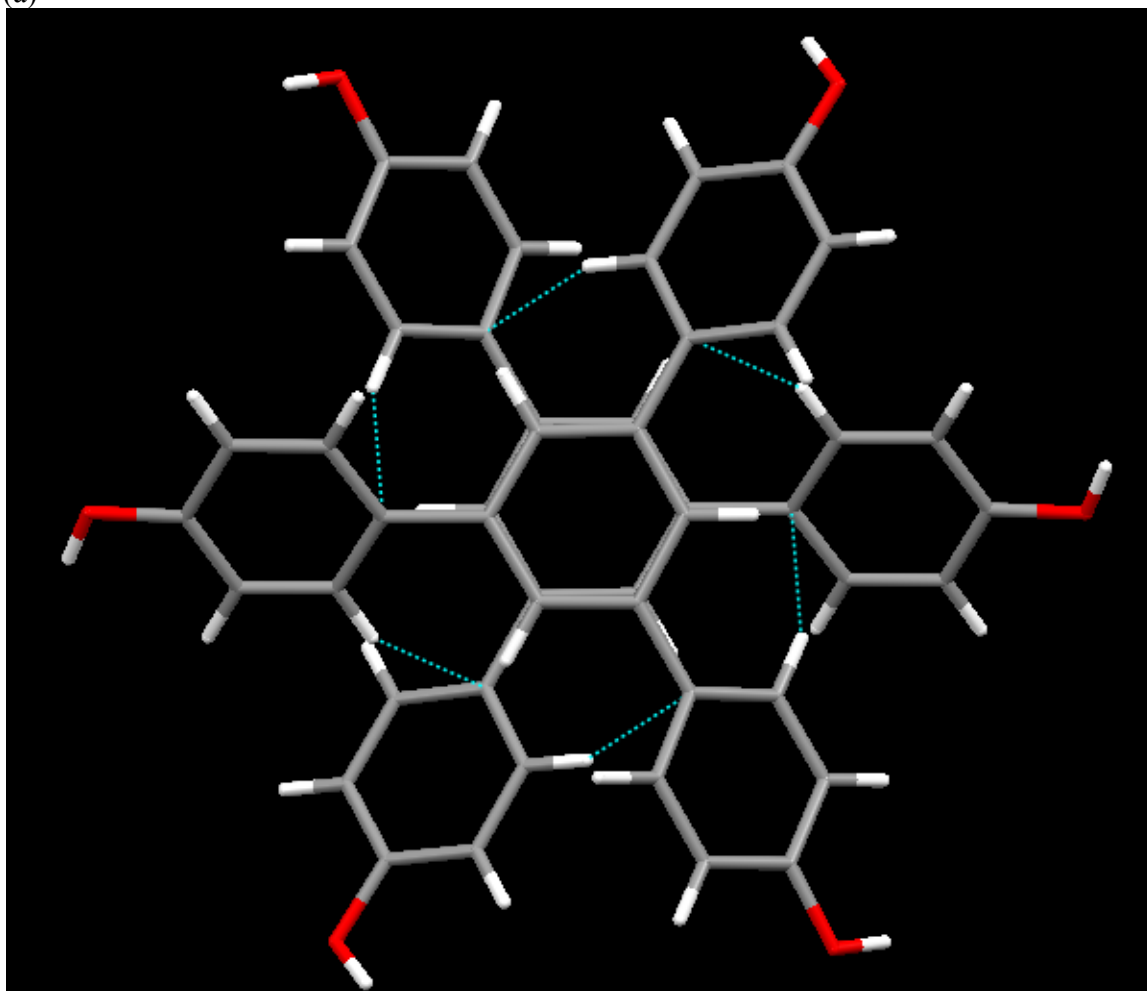

(b)

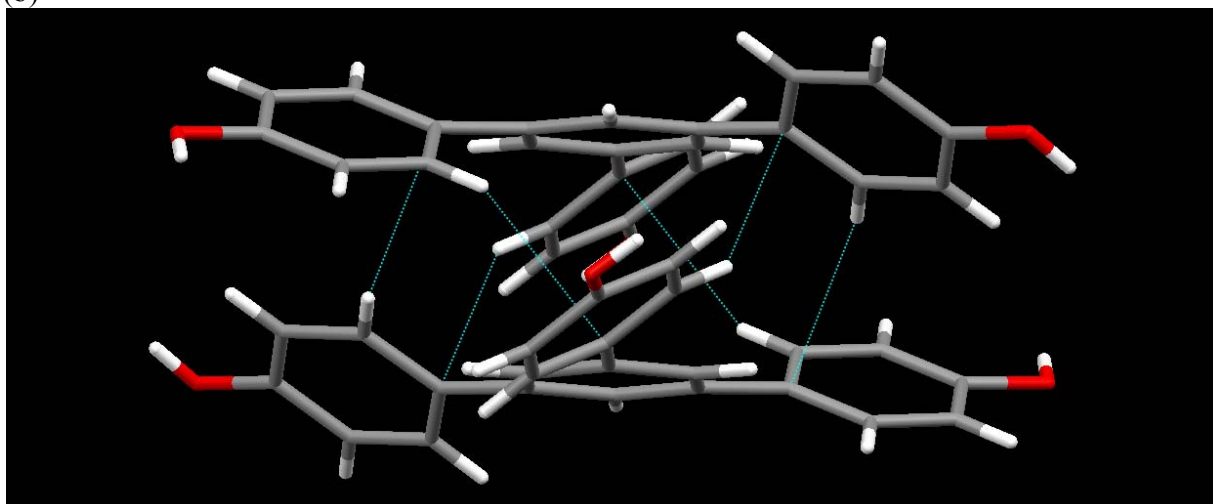

Fig. S2: (a) Top view showing staggered arrangement/piedfort unit of **2** and (b) side view showing CH- $\pi$  interactions between **2** and **2** of two successive layers.

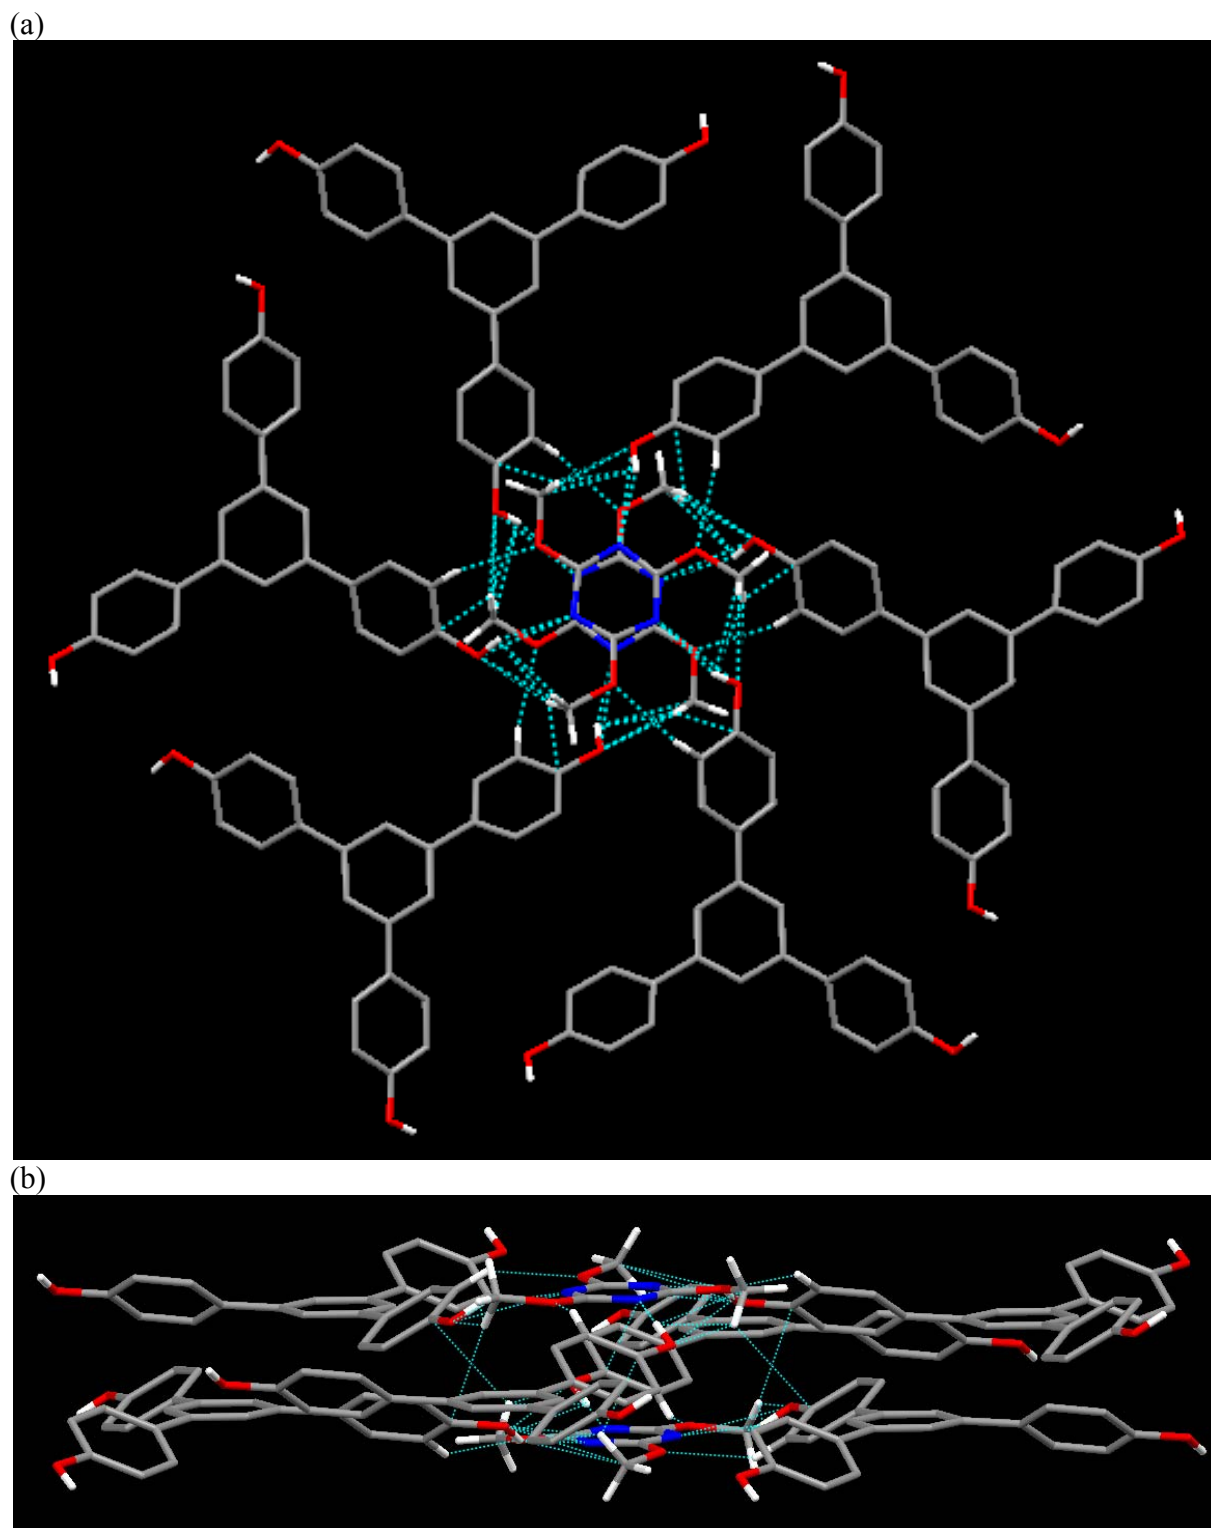

Fig. S3: (a) Top view showing staggered arrangement/piedfort unit of **1**, and (b) side view showing CH- $\pi$  interactions between methoxy group of **1** and phenyl group of **2** of two successive layers.

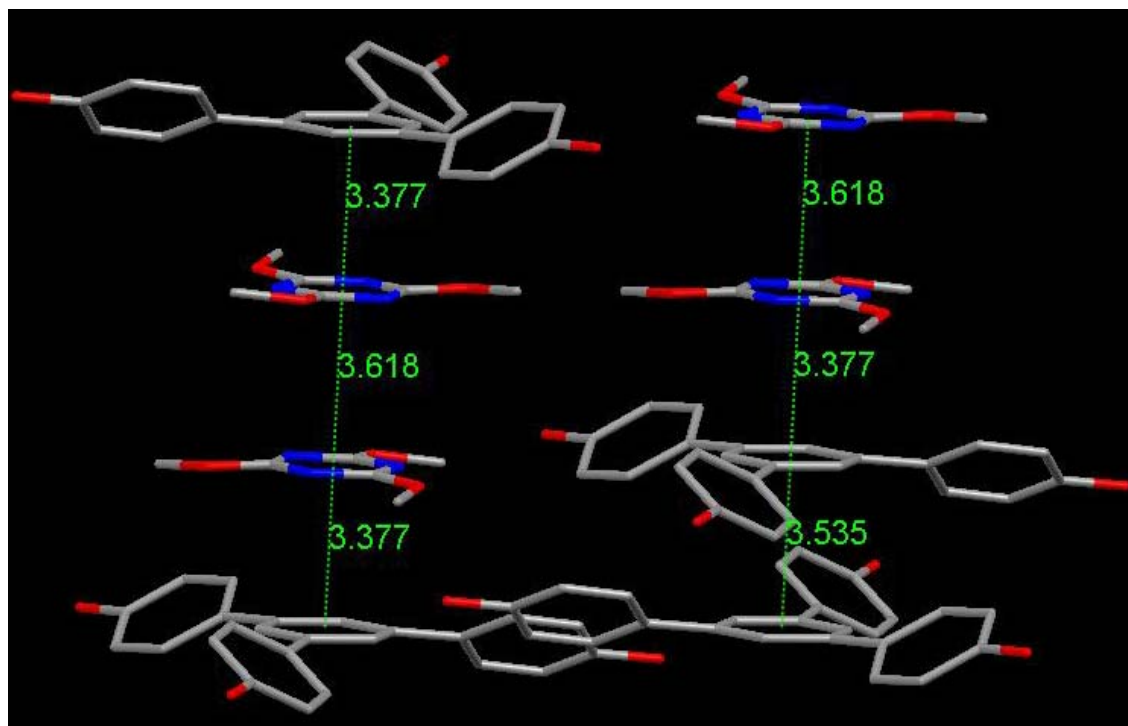

Fig. S4: (a) Side view showing distances between different aromatic units.

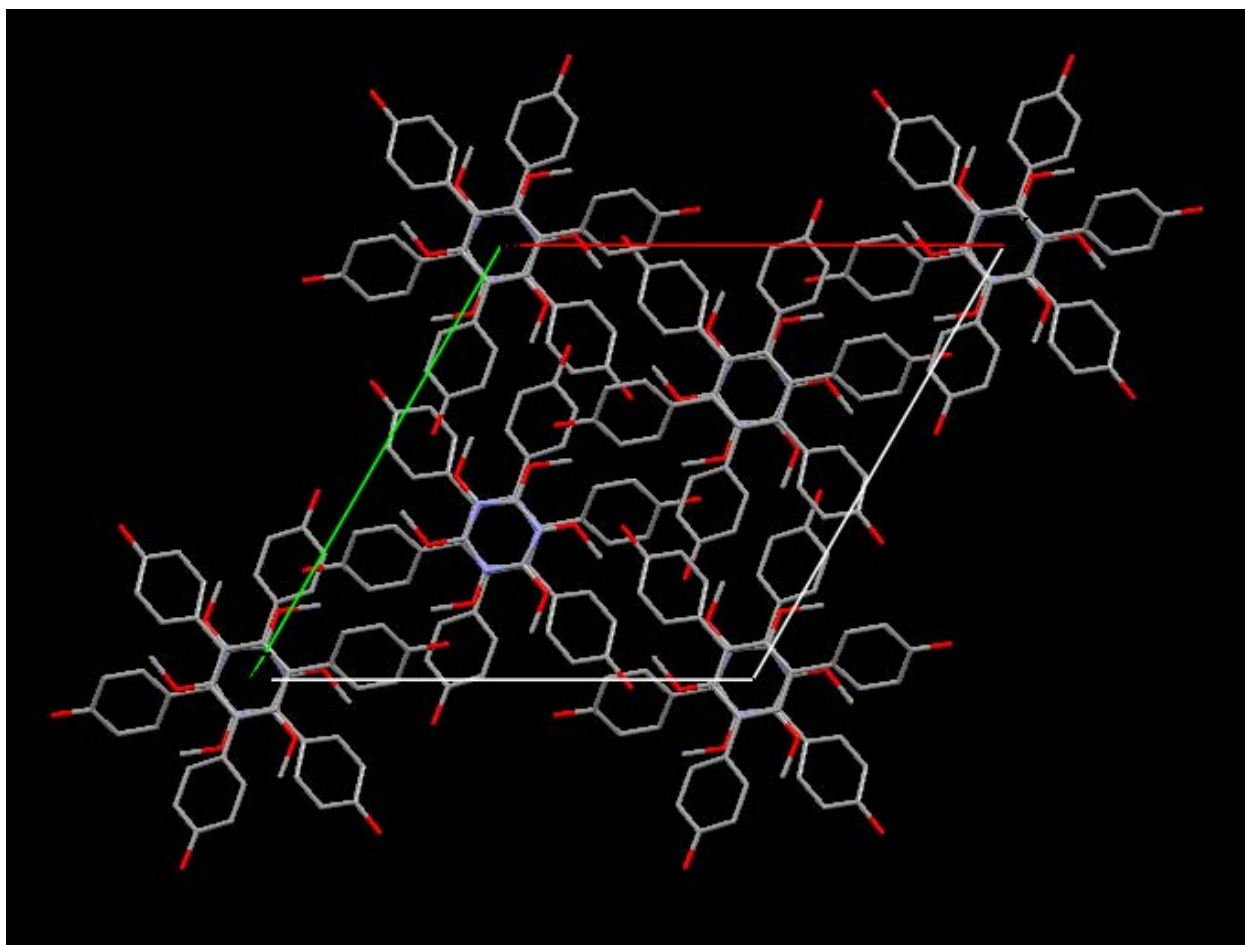

Fig. S5: A unit cell: viewed along the crystallographic c-axis

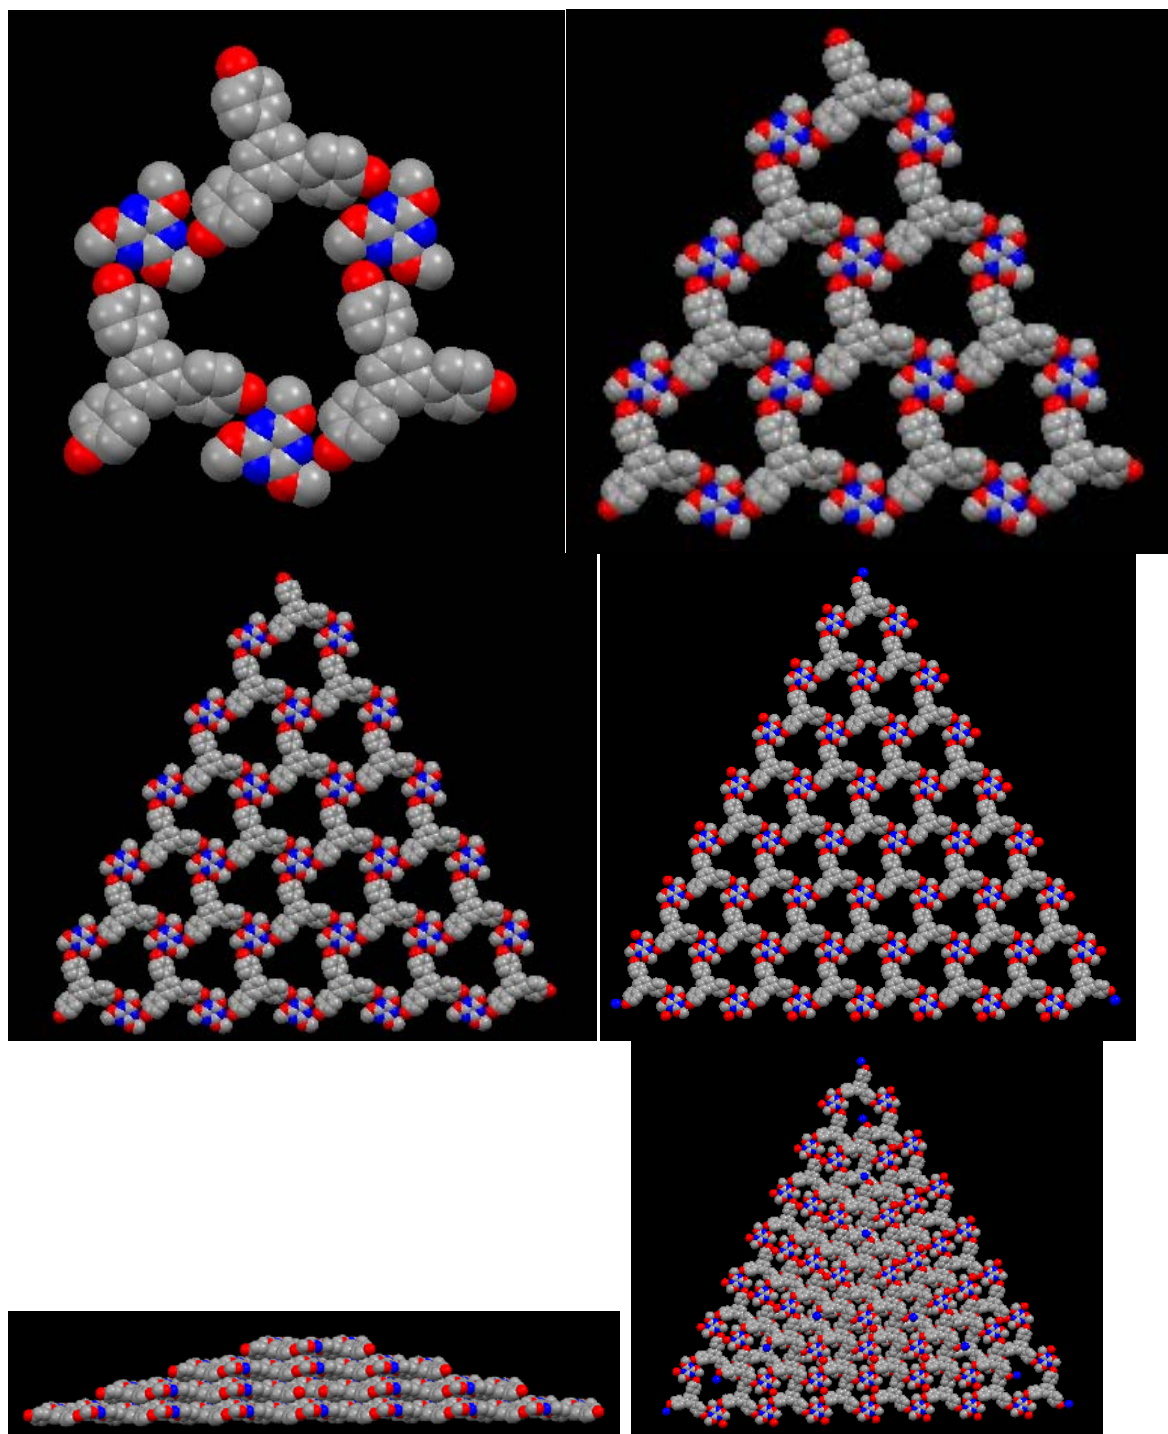

Fig. S6: A spacefill pyramid depiction of layered structure to better view the packing and staggered arrangement of hexagonal blocks in crystal packing.
